# Supplementary material for: Association between tea consumption and risk of cognitive disorders: A dose-response meta-analysis of observational studies
Source: PubMed Central journal article supplement (PMC5522147; doi:10.18632/oncotarget.17429), 2017-04-26
Supplement: oncotarget-08-43306-s001.pdf [file oncotarget-08-43306-s001.pdf]

# Association between tea consumption and risk of cognitive disorders: A dose-response meta-analysis of observational studies

## SUPPLEMENTARY FIGURES AND TABLES

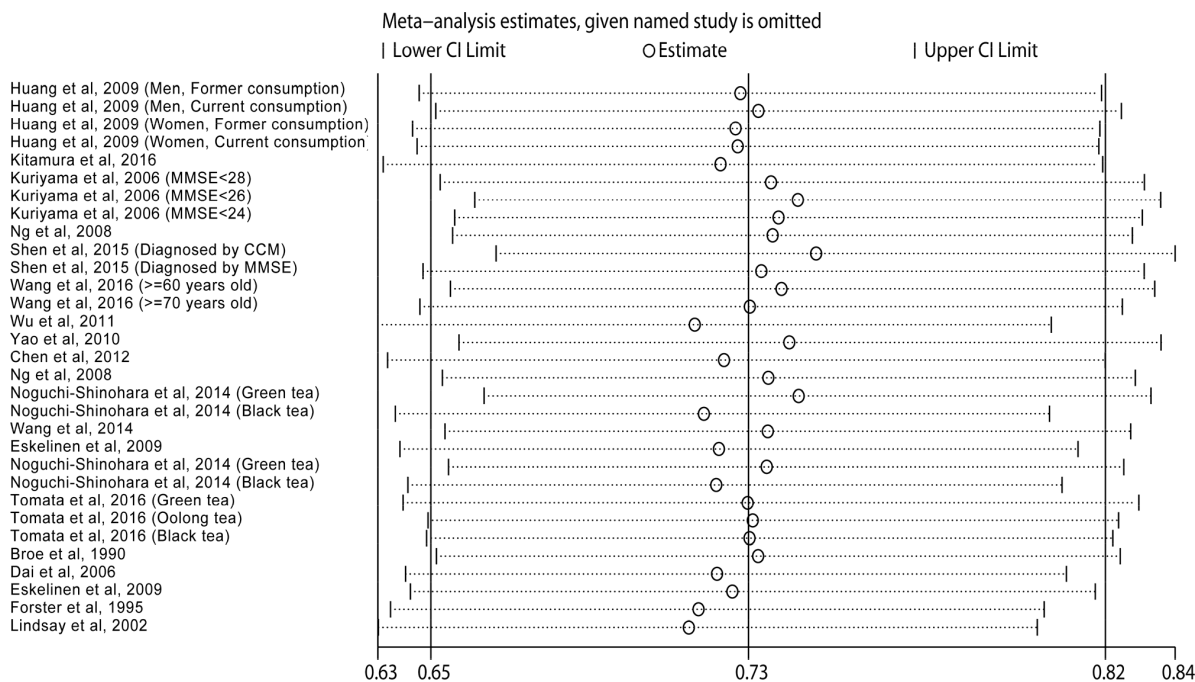

**Supplementary Figure 1: Sensitivity analysis.** Relative risk of cognitive disorders according to the highest vs. lowest category of tea consumption by omitting one study in turn.

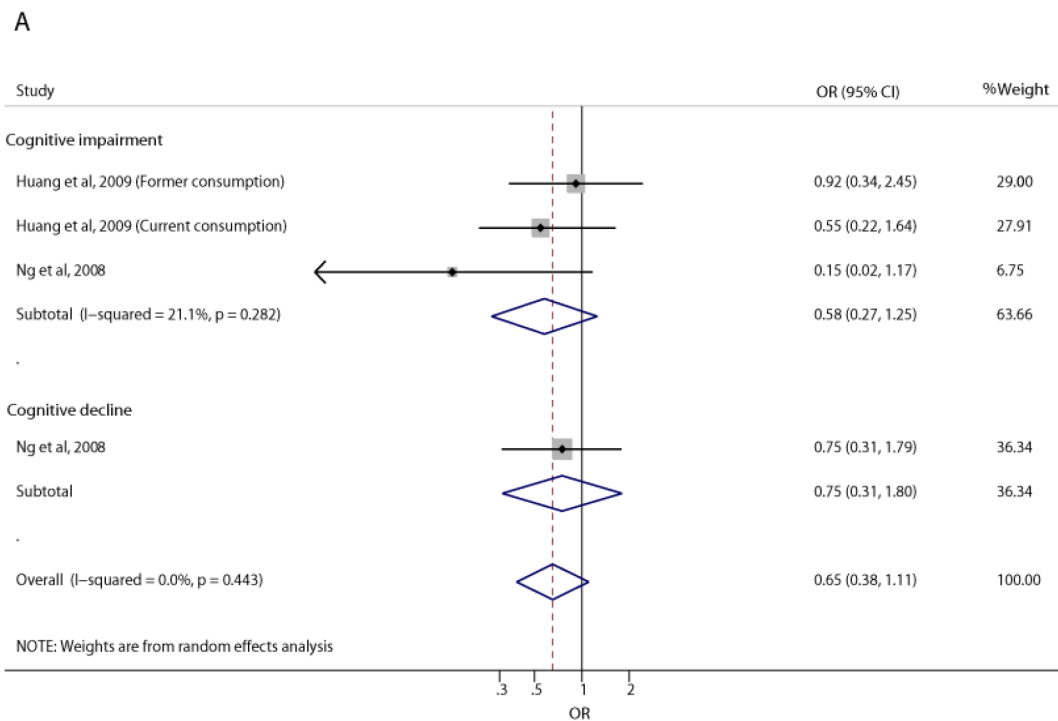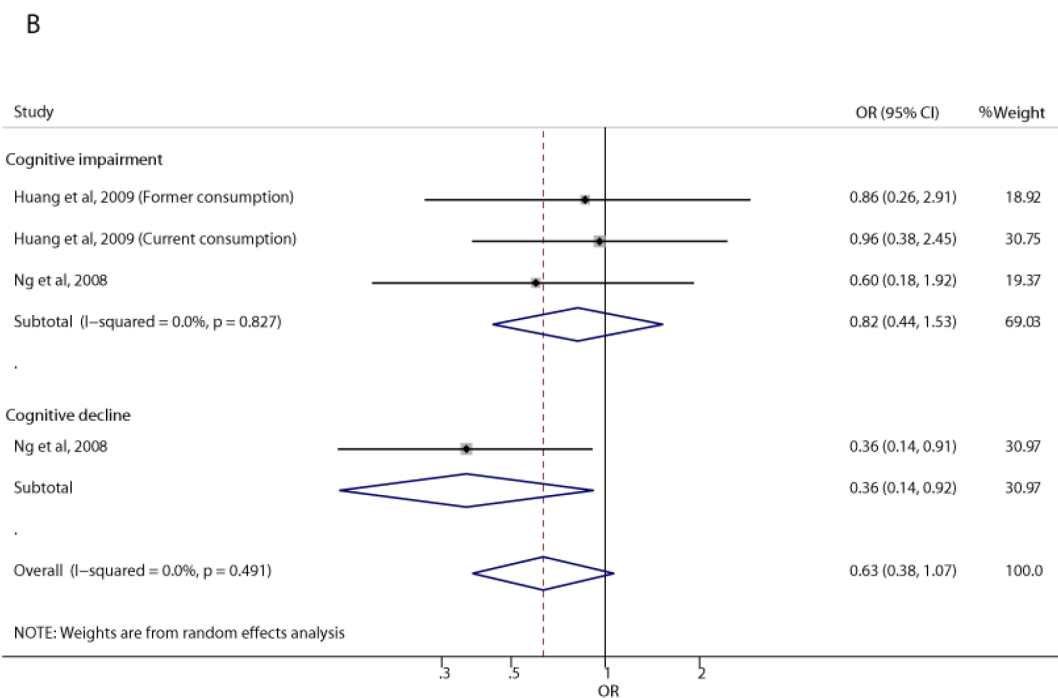

**Supplementary Figure 2:** Relative risks of cognitive disorders according to the highest vs. lowest category of tea consumption among men (A) and women (B).

**Supplementary Table 1: MOOSE Checklist**

See Supplementary File 1

Supplementary Table 2: Levels of tea consumption and the conversions of categories

| Reference                     | Exposure variable | Original categories      | Conversional categories <sup>a</sup> |
|-------------------------------|-------------------|--------------------------|--------------------------------------|
| Dai et al, 2006               | Tea of all types  | <1 cup/wk                | 15.4 ml/day                          |
|                               |                   | 1-2 cups/wk              | 46.1 ml/day                          |
|                               |                   | >=3 cups/wk              | 115.2 ml/day                         |
| Kitamura et al, 2016          | Green tea         | None                     | 0                                    |
|                               |                   | 1-6 cups/wk              | 107.5 ml/day                         |
|                               |                   | 1 cup/d                  | 215 ml/day                           |
| Kuriyama et al, 2006          | Green tea         | <=3 cups/wk              | 46.1 ml/day                          |
|                               |                   | 4-6 cups/wk or 1 cup/d   | 153.6 ml/day                         |
|                               |                   | >=2 cups/d               | 537.5 ml/day                         |
| Ng et al, 2008                | Tea of all types  | <1 cup/wk                | 15.4 ml/day                          |
|                               |                   | 1-3 cups/wk              | 61.4 ml/day                          |
|                               |                   | >3 cups/wk but <3 cups/d | 368.6 ml/day                         |
|                               |                   | >=3 cups/d               | 806.3 ml/day                         |
| Noguchi-Shinohara et al, 2014 | Green tea         | None                     | 0 ml/day                             |
|                               |                   | 1-6 cups/week            | 107.5 ml/day                         |
|                               |                   | 1 cup/day                | 215 ml/day                           |
| Shen et al, 2015              | Tea of all types  | Non-consumption          | 0 ml/day                             |
|                               |                   | <2 cups/d                | 215 ml/day                           |
|                               |                   | 2-4 cups/d               | 645 ml/day                           |
|                               |                   | >=4 cups/d               | 1075 ml/day                          |
| Tomata et al, 2016            | Green tea         | <1 cup/day               | 107.5 ml/day                         |
|                               | Black tea         | 1-2 cups/day             | 322.5 ml/day                         |
|                               | Oolong tea        | 3-4 cups/day             | 752.5 ml/day                         |
|                               |                   | >=5 cups/day             | 1343.75 ml/day                       |
| Wu et al, 2011                | Tea of all types  | No                       | 0                                    |
|                               |                   | <1 cup/wk                | 15.4 ml/day                          |
|                               |                   | >=1 cup/wk               | 38.4 ml/day                          |

<sup>a</sup> We assume that one cup of tea is 215 ml. We converted the level of consumption category based on the calculated midpoint of tea consumption if the study did not report the median of exposure category. If the maximum dose was fixed unlimitedly (e.g. >=2 cups/d), we assumed that the mean was 25% larger than the lower level of the specific category.

**Supplementary Table 3: Quality assessment of the included studies (cohort studies)**

See Supplementary File 1

Supplementary Table 4: Quality assessment of the included studies (case-control studies)

| Study               | Selection                          |                                                                      |                                              | Comparability           |                                                                            | Exposure                  |                                                     | Overall quality assessment score (of a maximum of 9) |                   |
|---------------------|------------------------------------|----------------------------------------------------------------------|----------------------------------------------|-------------------------|----------------------------------------------------------------------------|---------------------------|-----------------------------------------------------|------------------------------------------------------|-------------------|
|                     | Is the case definition adequate?   | Representativeness of the cases                                      | Selection of controls                        | Definition of Controls  | Comparability of cases and controls on the basis of the design or analysis | Ascertainment of exposure | Same method of ascertainment for cases and controls |                                                      | Non-Response rate |
| Broe et al, 1990    | * Yes, with independent validation | * Somewhat representative of the average population in the community | * Drawn from the same community as the cases | * No history of disease | * The study controls for age, sex and the general practice of origin       | * Secure record           | * Yes                                               | * Same rate for both groups                          | 8                 |
| Chen et al, 2012    | * Yes, with independent validation | * Truly representative of the average population in the community    | * Drawn from the same community as the cases | * No history of disease | The study did not control for other factors                                | * Secure record           | * Yes                                               | * Same rate for both groups                          | 7                 |
| Forster et al, 1995 | * Yes, with independent validation | * Somewhat representative of the average population in the community | * Drawn from the same community as the cases | * No history of disease | The study did not control for other factors                                | * Secure record           | * Yes                                               | * Same rate for both groups                          | 7                 |

**Supplementary Table 5: Quality assessment of the included studies (cross-sectional studies)**

See Supplementary File 1
